# Supplementary material
Source: HighWire-hosted journal article supplement (https://bmjopen.bmj.com/content/12/4/e058308)
Supplement: inline-supplementary-material-1 [file inline-supplementary-material-1.pdf]

## Search Strategy

### Database: Embase

#### Search Strategy:

- 1 exp coronavirus/
- 2 exp coronavirus infections/
- 3 (Coronavir\* or nCov or covid or Middle East Respiratory Syndrome or MERS or Severe Acute Respiratory Syndrome or SARS).ti,ab,tw.
- 4 1 or 2 or 3
- 5 (adolescent or (pre?school adj child) or child or infant or baby or toddler or juvenile).ti,ab,tw.
- 6 (bab\$ or infant or child or boy or girl or teen\$ or school?child\$).ti,ab,tw.
- 7 5 or 6
- 8 4 and 7
- 9 8
- 10 limit 9 to human
- 11 10
- 12 limit 11 to yr="2019 -Current"
- 13 12
- 14 limit 13 to english language

\*\*\*\*\*

### Database: Ovid MEDLINE(R) ALL

#### Search Strategy:

- 1 exp Coronavirus/
- 2 exp Coronavirus Infections/
- 3 (Coronavir\* or nCov or covid or covid-19 or Middle East Respiratory Syndrome or MERS or Severe Acute Respiratory Syndrome or SARS).ti,ab,kf.
- 4 1 or 2 or 3
- 5 (baby or babies or infant\* or child\* or boy\* or girl\* or toddler\* or preschool\* or pre?school\* or teen\* or schoolchild\* or adolescen\* or juvenil\*).tw.
- 6 4 and 5
- 7 humans.sh.
- 8 6 and 7
- 9 limit 8 to yr="2019 -Current"
- 10 9
- 11 limit 10 to english language
